# Supplementary material
Source: PubMed Central journal article supplement (PMC2937944)
Supplement: supp_M110.135905_jbc.M110.135905-1.pdf [file supp_M110.135905_jbc.M110.135905-1.pdf]

**Supplemental Table 1**

| Secondary structure <sup>a</sup> (%) of Wt-Prx1 and p-Wt-Prx1 products at 25°C |                      |       |      |                      |     |      |       |           |
|--------------------------------------------------------------------------------|----------------------|-------|------|----------------------|-----|------|-------|-----------|
| Protein                                                                        | H ( $\alpha$ -helix) |       |      | S ( $\beta$ -strand) |     |      | Turns | Unordered |
|                                                                                | I                    | II    | III  | I                    | II  | III  |       |           |
| WT-Prx1                                                                        | 11.8                 | 12.8  | 24.6 | 11.7                 | 8.9 | 20.6 | 23.7  | 31.0      |
| p-WT-Prx1                                                                      | 9.3                  | 14.95 | 24.2 | 3.0                  | 5.7 | 8.7  | 28.2  | 38.8      |

<sup>a</sup>I-III: – structure regular, distorted and total, respectively.
