# Supplementary material
Source: PubMed Central journal article supplement (PMC2937944)

Supplemental Fig. 1

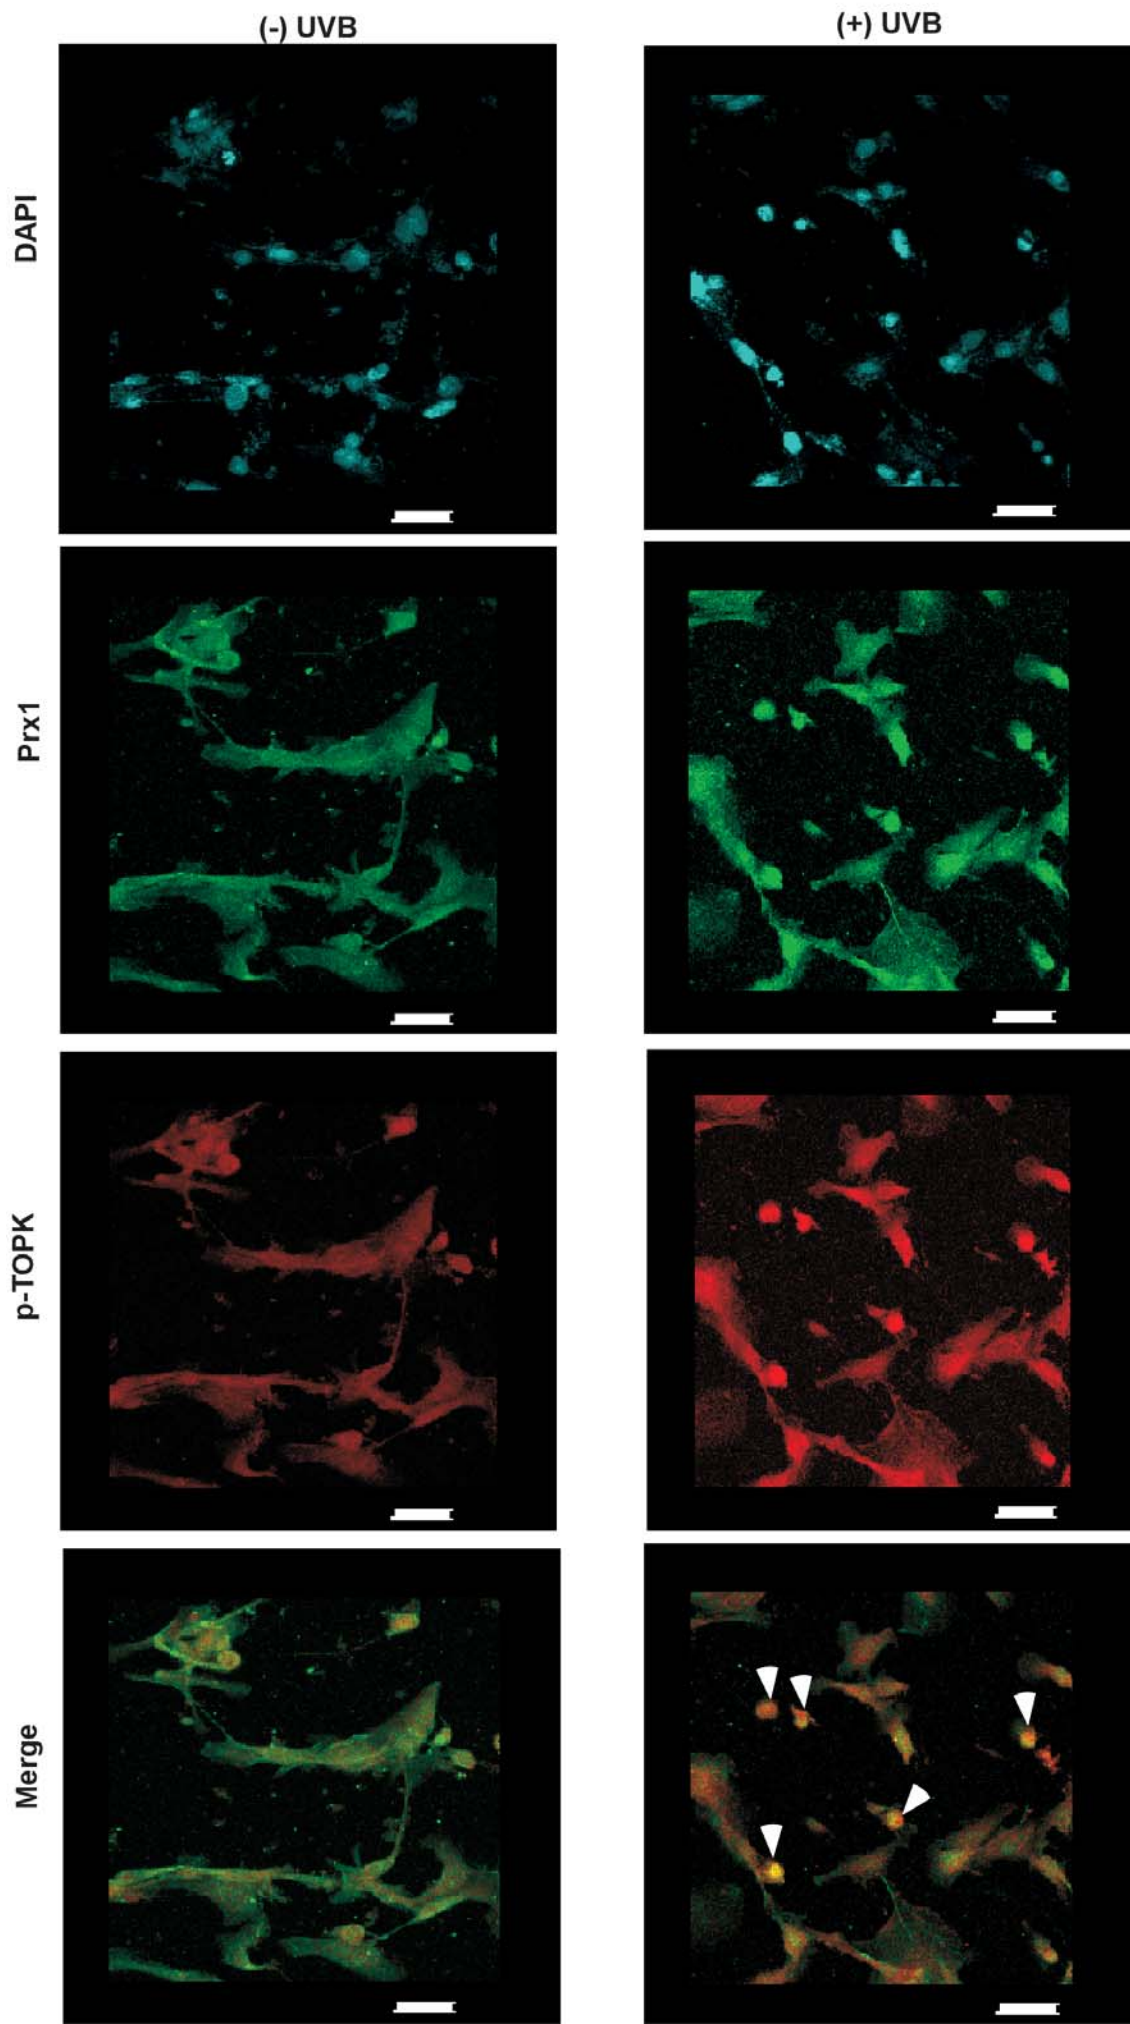

Supplement: supp_M110.135905_jbc.M110.135905-3.pdf [file supp_M110.135905_jbc.M110.135905-3.pdf]

**Supplemental Fig. 2**

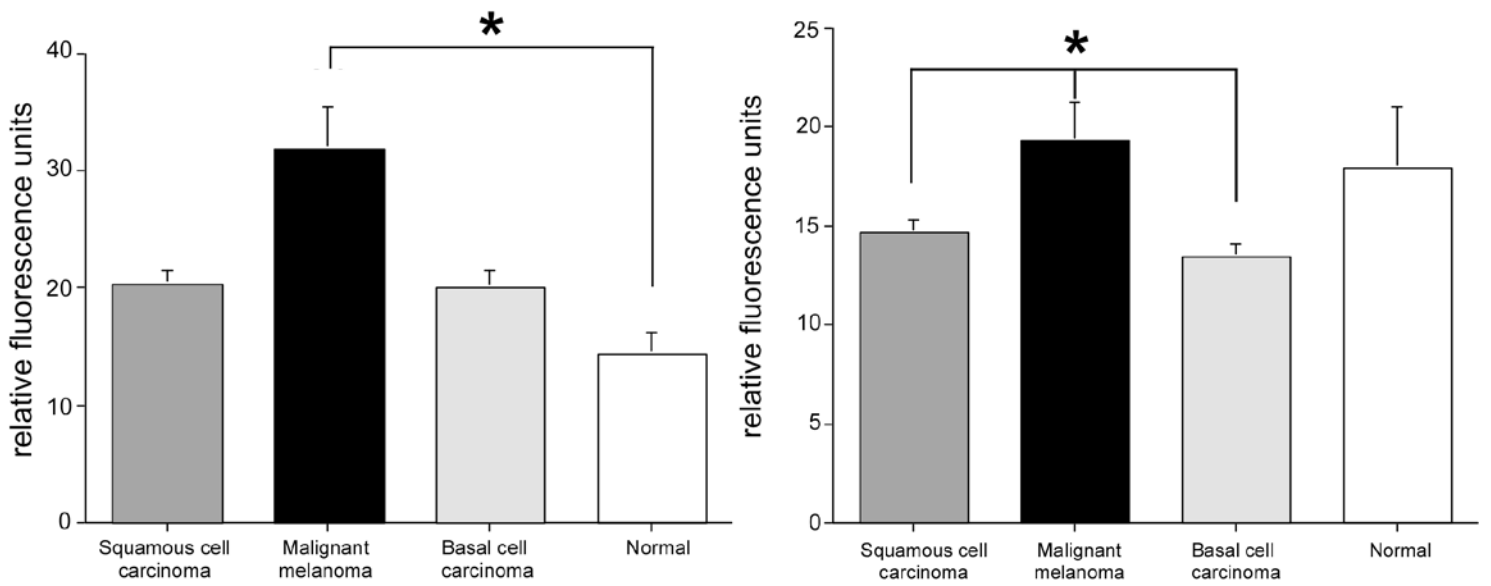

Supplement: supp_M110.135905_jbc.M110.135905-4.pdf [file supp_M110.135905_jbc.M110.135905-4.pdf]

# Supplemental Fig. 3 A and B

A

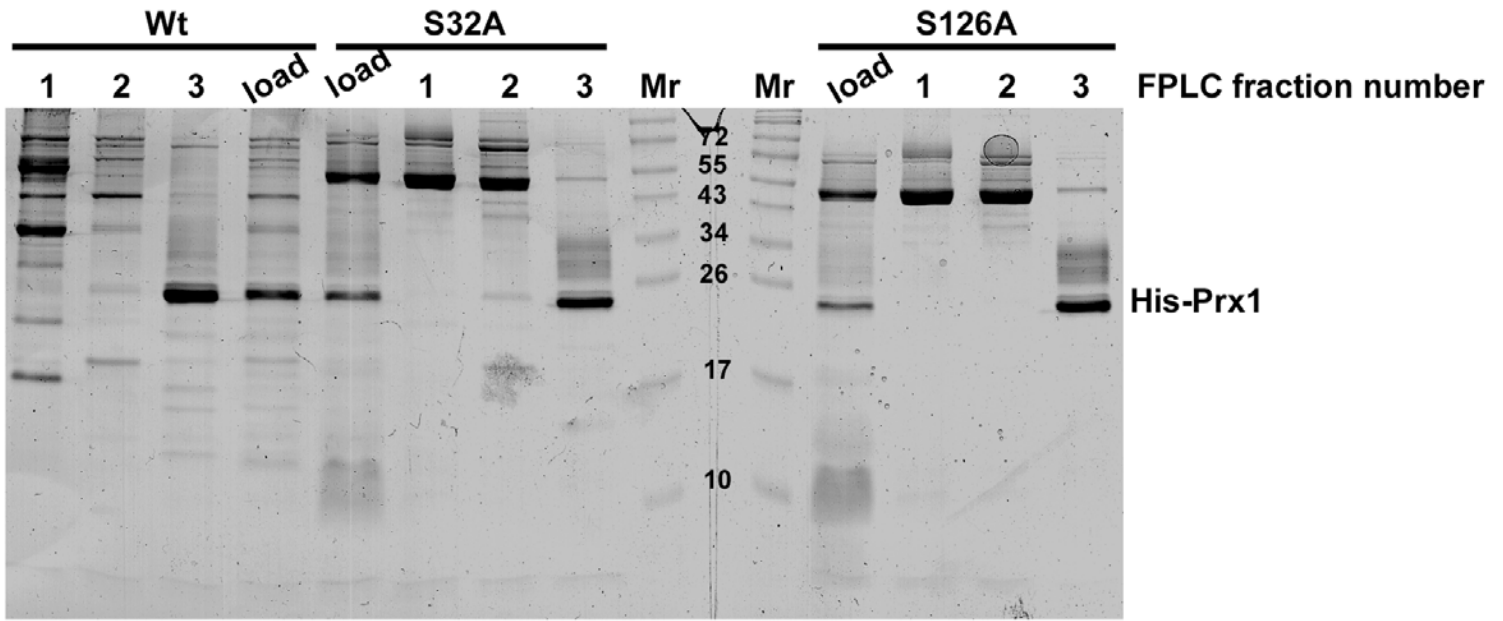

B

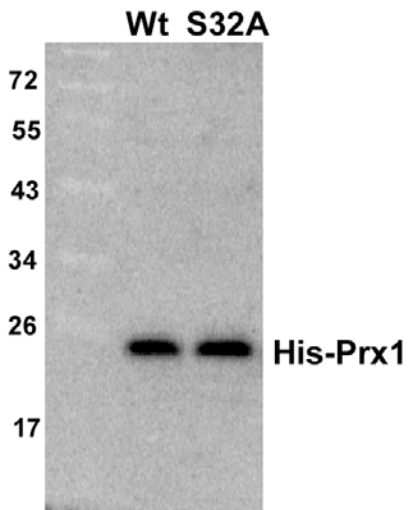

Supplement: supp_M110.135905_jbc.M110.135905-5.pdf [file supp_M110.135905_jbc.M110.135905-5.pdf]
